# Supplementary material for: Soul of the Jukskei River: The Extent of Bacterial Contamination in the Jukskei River in Gauteng Province, South Africa
Source: MDPI journal article supplement (doi:10.3390/ijerph18168537), 2021-08-12
Supplement: s1 [file s1]

**Table S1.** Details of categories and concentration ranges of antimicrobials tested using the AST-P645 card.

| Category                  | Antimicrobial                    | Range                    |
|---------------------------|----------------------------------|--------------------------|
| Cephalomycins             | Cefoxitin Screen                 | Negative or Positive     |
| Penicillins               | Oxacillin                        | 0.25 – 4 µg/mL           |
| Non-Extended Spectrum     | Cefuroxime                       | 1 – 64 µg/mL             |
| Cephalosporins            | Cefuroxime Axetil                | 1 – 64 µg/mL             |
| Aminoglycosides           | Gentamicin High Level (synergy)  | Susceptible or Resistant |
|                           | Gentamicin                       | 0.5 – 16 µg/mL           |
| Fluoroquinolones          | Ciprofloxacin                    | 0.5 – 8 µg/mL            |
|                           | Moxifloxacin                     | 0.25 – 8 µg/mL           |
| Lincosamides              | Inducible Clindamycin Resistance | Negative or Positive     |
|                           | Clindamycin                      | 0.125 – 4 µg/mL          |
| Macrolides                | Erythromycin                     | 0.25 – 8 µg/mL           |
|                           | Telithromycin                    | 0.25 – 4 µg/mL           |
| Oxazolidinones            | Linezolid                        | 0.5 – 8 µg/mL            |
| Lipopeptides              | Daptomycin                       | 0.12 – 8 µg/mL           |
| Glycopeptides             | Teicoplanin                      | 0.5 – 32 µg/mL           |
|                           | Vancomycin                       | 0.5 – 32 µg/mL           |
| Tetracyclines             | Tetracycline                     | 1 – 6 µg/mL              |
| Nitrofurantoin            | Nitrofurantoin                   | 16 – 512 µg/mL           |
| Fucidanes                 | Fusidic Acid                     | 0.5 – 32 µg/mL           |
| Carboxylic Acids          | Mupirocin                        | 1 – 512 µg/ mL           |
| Ansamycins                | Rifampicin                       | 0.5 – 32 µg/ mL          |
| Folate Pathway Inhibitors | Trimethoprim/ Sulfamethoxazole   | 10 – 320 µg/ mL          |

**Table S2.** Details of categories and concentration ranges of antimicrobials tested using the AST-N256 card.

| Category                                  | Antimicrobial                  | Range               |
|-------------------------------------------|--------------------------------|---------------------|
| Penicillins                               | Ampicillin                     | 2 – 32 µg/mL        |
| Penicillin and $\beta$ -Lactam Inhibitors | Amoxicillin/ Clavulanic acid   | 2/ 1 – 32/ 16 µg/mL |
| Anti-Pseudomonal Penicillins              | Piperacillin/ Tazobactam       | 4/ 4 – 128/ 4 µg/mL |
| Non-Extended Spectrum Cephalosporins      | Cefuroxime                     | 1 – 64 µg/mL        |
|                                           | Cefuroxime-Axetil              | 1 – 64 µg/mL        |
| Cephalomycins                             | Cefoxitin                      | 4 – 64 µg/mL        |
| Extended Spectrum Cephalosporins          | Cefotaxime                     | 1 – 64 µg/mL        |
|                                           | Ceftazidime                    | 1 – 64 µg/mL        |
|                                           | Cefepime                       | 1 – 64 µg/mL        |
| Carbapenems                               | Ertapenem                      | 0.5 – 8 µg/mL       |
|                                           | Imipenem                       | 0.25 – 16 µg/mL     |
|                                           | Meropenem                      | 0.25 – 16 µg/mL     |
| Aminoglycosides                           | Amikacin                       | 2 – 64 µg/mL        |
|                                           | Gentamicin                     | 1 – 16 µg/mL        |
|                                           | Tobramycin                     | 1 – 16 µg/mL        |
| Fluoroquinolones                          | Ciprofloxacin                  | 0.25 – 4 µg/mL      |
| Glycylcyclines                            | Tigecycline                    | 0.5 – 8 µg/mL       |
| Polymixins                                | Colistin                       | 0.5 – 16 µg/mL      |
| Folate pathway inhibitors                 | Trimethoprim/ Sulfamethoxazole | 20 – 320 µg/mL      |

**Table S3.** Antimicrobial susceptibility profiles Gram-positive cocci subjected to AST.

| Lab no. | Organism                            | Cefoxitin Screen | Oxacillin | Cefuroxime | Cefuroxime Axetil | Gentamicin High Level<br>( <small>gent</small> ) | Gentamicine | Ciprofloxacin | Moxifloxacin | Inducible Clindamycin<br>Resistance | Erythromycin | Telithromycin | Clindamycin | Linezolid | Daptomycin | Teicoplanin | Vancomycin | Tetracycline | Nitrofrantoin | Fusidic Acid | Mupirocin | Rifampicin | Trimethoprim/<br>Sulfamethoxazole | No of categories NS | NS to 0 categories | NS to 1 - 2 categories | MDR (NS to 3 or more) | XDR (NS to 13 or more) | PDR (NS to all 15<br><small>categories</small> ) |  |
|---------|-------------------------------------|------------------|-----------|------------|-------------------|--------------------------------------------------|-------------|---------------|--------------|-------------------------------------|--------------|---------------|-------------|-----------|------------|-------------|------------|--------------|---------------|--------------|-----------|------------|-----------------------------------|---------------------|--------------------|------------------------|-----------------------|------------------------|--------------------------------------------------|--|
| JR1h    | <i>Enterococcus faecalis</i>        |                  |           |            |                   | R                                                |             | R             |              |                                     | R            |               |             | S         |            | R           | R          | S            | R             |              |           |            |                                   | 6                   | 0                  | 0                      | 1                     | 0                      | 0                                                |  |
| JR2g    | <i>Enterococcus faecalis</i>        |                  |           |            |                   | R                                                |             | R             |              |                                     | R            |               |             | S         |            | R           | R          | S            | R             |              |           |            |                                   | 6                   | 0                  | 0                      | 1                     | 0                      | 0                                                |  |
| JR2h    | <i>Enterococcus faecalis</i>        |                  |           |            |                   | R                                                |             | R             |              |                                     | R            |               |             | S         |            | R           | R          | R            | R             |              |           |            |                                   | 7                   | 0                  | 0                      | 1                     | 0                      | 0                                                |  |
| JR2j    | <i>Enterococcus faecalis</i>        |                  |           |            |                   | S                                                |             | I             |              |                                     | R            |               |             | S         | S          | R           | R          | S            | I             |              |           |            |                                   | 5                   | 0                  | 0                      | 1                     | 0                      | 0                                                |  |
| JR3x    | <i>Staphylococcus cohnii cohnii</i> |                  |           |            |                   |                                                  | S           | S             | R            |                                     | R            | S             | S           |           |            | I           | S          | S            | S             | R            |           | S          | R                                 | 5                   | 0                  | 0                      | 1                     | 0                      | 0                                                |  |
| JR5k    | <i>Staphylococcus haemolyticus</i>  |                  | R         |            |                   |                                                  | R           | R             | R            |                                     | S            | S             | R           |           |            | I           | I          | R            | S             | S            |           | S          | R                                 | 8                   | 0                  | 0                      | 1                     | 0                      | 0                                                |  |
| JR5l    | <i>Staphylococcus cohnii cohnii</i> |                  |           |            |                   |                                                  | S           | I             | R            |                                     | R            | S             |             |           |            | I           | S          | S            | I             | R            |           | S          | R                                 | 6                   | 0                  | 0                      | 1                     | 0                      | 0                                                |  |
| JR8f    | <i>Staphylococcus warneri</i>       |                  | R         |            |                   |                                                  | S           | R             | R            |                                     | R            |               |             |           | S          |             |            |              | R             |              |           |            | S                                 | 4                   | 0                  | 0                      | 1                     | 0                      | 0                                                |  |
|         |                                     |                  |           |            |                   |                                                  |             |               |              |                                     |              |               |             |           |            |             |            |              |               |              |           |            |                                   |                     | 0                  | 0                      | 8                     | 0                      | 0                                                |  |
| S       | Susceptible                         |                  |           |            |                   |                                                  |             |               |              |                                     |              |               |             |           |            |             |            |              |               |              |           |            |                                   |                     |                    |                        |                       |                        |                                                  |  |
| I       | Intermediately resistant            |                  |           |            |                   |                                                  |             |               |              |                                     |              |               |             |           |            |             |            |              |               |              |           |            |                                   |                     |                    |                        |                       |                        |                                                  |  |
| R       | Resistant                           |                  |           |            |                   |                                                  |             |               |              |                                     |              |               |             |           |            |             |            |              |               |              |           |            |                                   |                     |                    |                        |                       |                        |                                                  |  |

Table S4. Antimicrobial susceptibility profiles Gram-negative bacilli subjected to AST.

| Lab no. | Organism                               | Ampicillin | Amoxicillin/ Clavulanic acid | Piperacillin/ Tazobactam | Cefuroxime | Cefuroxime/ Axetil | Cefoxitin | Cefotaxime | Ceftazidime | Cefepime | Ertapenem | Imipenem | Meropenem | Amikacin | Gentamicin | Tobramycin | Ciprofloxacin | Tigecycline | Colistin | Trimethoprim/<br>Sulfamethoxazole | No of categories NS | NS to 0 categories | NS to 1 - 2 categories | MDR (NS to 3 or more) | XDR (NS to 11 or more) | PDR (NS to all 13 categories) |
|---------|----------------------------------------|------------|------------------------------|--------------------------|------------|--------------------|-----------|------------|-------------|----------|-----------|----------|-----------|----------|------------|------------|---------------|-------------|----------|-----------------------------------|---------------------|--------------------|------------------------|-----------------------|------------------------|-------------------------------|
| JR1a1   | <i>Aeromonas sobria</i>                | S          | S                            | S                        |            | S                  |           | S          | S           |          | S         |          | S         | S        |            | S          | S             |             | S        | 0                                 | 1                   | 0                  | 0                      | 0                     | 0                      |                               |
| JR1a2   | <i>Aeromonas hydrophila/caviae</i>     | S          | S                            | S                        |            | S                  |           | S          | S           |          | S         |          | S         | S        |            | S          | S             |             | S        | 0                                 | 1                   | 0                  | 0                      | 0                     | 0                      |                               |
| JR1b    | <i>Aeromonas hydrophila/caviae</i>     | I          | S                            | R                        |            | S                  |           | S          | S           |          | S         |          | S         | S        |            | S          | S             |             | R        | 3                                 | 0                   | 0                  | 1                      | 0                     | 0                      |                               |
| JR1c    | <i>Aeromonas sobria</i>                | R          |                              | R                        |            | R                  |           | S          | S           |          | S         |          | S         | S        |            | S          | S             |             | S        | 3                                 | 0                   | 0                  | 1                      | 0                     | 0                      |                               |
| JR1g    | <i>Kluyvera ascorbata</i>              | R          | R                            | S                        | R          | R                  | I         | R          | R           | S        | S         | I        | I         | S        | S          | R          | S             | S           | S        | R                                 | 8                   | 0                  | 0                      | 1                     | 0                      | 0                             |
| JR1i    | <i>Pseudomonas stutzeri</i>            |            | S                            |                          |            |                    |           | S          | S           | S        |           | S        | S         | I        | S          | S          | S             | S           |          | R                                 | 2                   | 0                  | 1                      | 0                     | 0                      | 0                             |
| JR1j1   | <i>Escherichia coli</i>                | R          | R                            | R                        | R          | R                  | S         | R          | R           | R        | S         | S        | S         | I        | I          | R          | R             | S           | S        | R                                 | 8                   | 0                  | 0                      | 1                     | 0                      | 0                             |
| JR1j2   | <i>Escherichia coli</i>                | R          | R                            | R                        | R          | R                  | S         | R          | R           | R        | S         | I        | S         | I        | I          | R          | R             | S           | S        | R                                 | 9                   | 0                  | 0                      | 1                     | 0                      | 0                             |
| JR2a    | <i>Pseudomonas aeruginosa</i>          |            |                              | R                        |            |                    |           | R          | R           | R        |           | S        | S         | S        | S          | S          | S             | R           | S        |                                   | 3                   | 0                  | 0                      | 1                     | 0                      | 0                             |
| JR2c    | <i>Aeromonas hydrophila/caviae</i>     | R          | S                            | R                        |            | R                  |           | R          | S           |          | S         |          |           | S        | S          |            | S             | S           |          | S                                 | 4                   | 0                  | 0                      | 1                     | 0                      | 0                             |
| JR2d    | <i>Aeromonas hydrophila/caviae</i>     | I          |                              | S                        |            | S                  |           | S          | R           |          | I         |          |           | S        | S          |            | S             | S           |          | S                                 | 3                   | 0                  | 0                      | 1                     | 0                      | 0                             |
| JR2e    | <i>Aeromonas sobria</i>                | S          |                              | S                        |            | S                  |           | S          | S           |          | I         |          |           | S        | S          |            | S             | S           |          | S                                 | 1                   | 0                  | 1                      | 0                     | 0                      | 0                             |
| JR2k    | <i>Escherichia coli</i>                | R          | R                            | R                        | R          | R                  | R         | R          | R           | R        | I         | I        | R         | S        | S          | S          | R             | S           | S        | R                                 | 9                   | 0                  | 0                      | 1                     | 0                      | 0                             |
| JR3a    | <i>Escherichia coli</i>                | R          | R                            | R                        | R          | R                  | R         | R          | R           | R        | I         | I        | I         | S        | R          | R          | R             | S           | S        | R                                 | 10                  | 0                  | 0                      | 1                     | 0                      | 0                             |
| JR3c    | <i>Escherichia coli</i>                | R          | R                            | R                        | R          | R                  | R         | R          | R           | R        | I         | I        | I         | I        | S          | R          | R             | S           | S        | S                                 | 9                   | 0                  | 0                      | 1                     | 0                      | 0                             |
| JR3f    | <i>Citrobacter braakii</i>             | R          | R                            | R                        | R          | R                  | R         | R          | R           | R        | S         | R        | S         | I        | R          | R          | S             | S           | S        | S                                 | 7                   | 0                  | 0                      | 1                     | 0                      | 0                             |
| JR3g    | <i>Aeromonas sobria</i>                | I          |                              | S                        |            | S                  |           | S          | S           |          | I         |          |           | S        | S          |            | S             | S           |          | S                                 | 2                   | 0                  | 1                      | 0                     | 0                      | 0                             |
| JR3i    | <i>Aeromonas hydrophila/caviae</i>     | S          | S                            | S                        |            | S                  |           | S          | S           |          | S         |          |           | S        | S          |            | S             | S           |          | S                                 | 2                   | 0                  | 1                      | 0                     | 0                      | 0                             |
| JR3p    | <i>Raoultella planticola</i>           | R          | S                            | S                        | R          | R                  | S         | S          | I           | S        | S         | R        | R         | S        | S          | S          | S             | S           | S        | S                                 | 4                   | 0                  | 0                      | 1                     | 0                      | 0                             |
| JR4a    | <i>Escherichia coli</i>                | R          | R                            | R                        | R          | R                  | R         | R          | R           | R        | I         | I        | R         | S        | R          | R          | R             | S           | S        | R                                 | 10                  | 0                  | 0                      | 1                     | 0                      | 0                             |
| JR4b    | <i>Acinetobacter baumannii complex</i> |            | R                            |                          |            | R                  |           | S          | S           |          | S         | S        |           | S        | S          | S          | S             | S           | R        | 3                                 | 0                   | 0                  | 1                      | 0                     | 0                      |                               |
| JR4d2   | <i>Citrobacter braakii</i>             | R          | R                            | R                        | R          | R                  | R         | R          | R           | R        | S         | I        | S         | I        | R          | R          | S             | S           | S        | S                                 | 7                   | 0                  | 0                      | 1                     | 0                      | 0                             |
| JR4h    | <i>Enterobacter asburiae</i>           | R          | I                            | R                        | R          | R                  | S         | R          | S           | S        | R         | S        | S         | S        | S          | S          | I             | S           | S        | R                                 | 8                   | 0                  | 0                      | 1                     | 0                      | 0                             |
| JR5d    | <i>Shewanella putrefaciens</i>         |            | S                            |                          |            | S                  |           | S          | S           | S        |           | R        | R         | S        | S          | S          | S             | S           | R        | S                                 | 2                   | 0                  | 1                      | 0                     | 0                      | 0                             |
| JR5i    | <i>Serratia plymuthica</i>             | S          | S                            | S                        | S          | S                  | S         | R          | S           | S        | S         | S        | S         | S        | S          | S          | S             | S           | R        | R                                 | 3                   | 0                  | 0                      | 1                     | 0                      | 0                             |
|         |                                        |            |                              |                          |            |                    |           |            |             |          |           |          |           |          |            |            |               |             |          |                                   | 2                   | 5                  | 18                     | 0                     | 0                      |                               |

|   |                          |
|---|--------------------------|
| S | Susceptible              |
| I | Intermediately resistant |
| R | Resistant                |
